# Supplementary material for: Method for absolute quantification of short chain fatty acids via reverse phase chromatography mass spectrometry
Source: PubMed Central journal article supplement (PMC9020710; doi:10.1371/journal.pone.0267093), 2022-04-20
Supplement: pone.0267093.s002.pdf [file pone.0267093.s002.pdf]

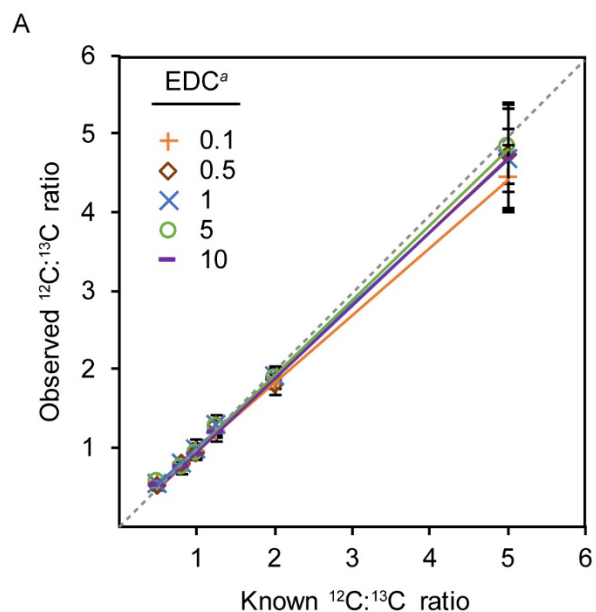

B

| EDC <sup>a</sup> | Regression line equation | r <sup>2</sup> |
|------------------|--------------------------|----------------|
| 0.1              | y = 0.8643x + 0.1050     | 0.999          |
| 0.5              | y = 0.9364x + 0.0238     | 0.998          |
| 1                | y = 0.9236x + 0.0696     | 0.999          |
| 5                | y = 0.9592x + 0.0124     | 0.999          |
| 10               | y = 0.9422x - 0.0102     | 0.999          |

<sup>a</sup> expressed as molar equivalent compared to the total number of moles of SCFAs.

**S2 Fig. Effect of the EDC molar equivalent on observed <sup>12</sup>C:<sup>13</sup>C ratio.** (A) Five different molar equivalents (0.1, 0.5, 1, 5 and 10) of EDC were each tested on six different <sup>12</sup>C/<sup>13</sup>C SCFA standard mixed solutions with a <sup>12</sup>C- and <sup>13</sup>C- standards concentration ratio of 0.5, 0.8, 1, 1.25, 2 and 5. Dashed line represents a slope = 1. Error bars represent standard deviation, averaged data for the three SCFAs. (B) Regression line equations and r<sup>2</sup> corresponding to plots in (A).
