# Supplementary material for: Method for absolute quantification of short chain fatty acids via reverse phase chromatography mass spectrometry
Source: PubMed Central journal article supplement (PMC9020710; doi:10.1371/journal.pone.0267093), 2022-04-20
Supplement: pone.0267093.s005.pdf [file pone.0267093.s005.pdf]

**S1 Table. Concentrations of  $^{12}\text{C}$ - and  $^{13}\text{C}$ -standard solutions used to make up indicated  $^{12}\text{C}:^{13}\text{C}$  concentration ratios.**

| $^{12}\text{C}\text{-SCFA}:$<br>$^{13}\text{C}\text{-SCFA}$ | $^{12}\text{C}\text{-SCFA},$<br>$\mu\text{M}$ | $^{13}\text{C}\text{-SCFA},$<br>$\mu\text{M}$ |
|-------------------------------------------------------------|-----------------------------------------------|-----------------------------------------------|
| 0.001                                                       | 1                                             | 1000                                          |
| 0.002                                                       | 2                                             | 1000                                          |
| 0.005                                                       | 5                                             | 1000                                          |
| 0.01                                                        | 10                                            | 1000                                          |
| 0.0125                                                      | 12.5                                          | 1000                                          |
| 0.02                                                        | 20                                            | 1000                                          |
| 0.05                                                        | 50                                            | 1000                                          |
| 0.08                                                        | 80                                            | 1000                                          |
| 0.1                                                         | 100                                           | 1000                                          |
| 0.125                                                       | 125                                           | 1000                                          |
| 0.16                                                        | 160                                           | 1000                                          |
| 0.2                                                         | 200                                           | 1000                                          |
| 0.5                                                         | 500                                           | 1000                                          |
| 0.8                                                         | 800                                           | 1000                                          |
| 1                                                           | 1000                                          | 1000                                          |
| 1.25                                                        | 1000                                          | 800                                           |
| 2                                                           | 1000                                          | 500                                           |
| 5                                                           | 1000                                          | 200                                           |
| 6.25                                                        | 1000                                          | 160                                           |
| 8                                                           | 1000                                          | 125                                           |
| 10                                                          | 1000                                          | 100                                           |
| 12.5                                                        | 1000                                          | 80                                            |
| 20                                                          | 1000                                          | 50                                            |
| 50                                                          | 1000                                          | 20                                            |
| 80                                                          | 1000                                          | 12.5                                          |
| 100                                                         | 1000                                          | 10                                            |
| 200                                                         | 1000                                          | 5                                             |
| 500                                                         | 1000                                          | 2                                             |
| 1000                                                        | 1000                                          | 1                                             |
