# Supplementary material for: Method for absolute quantification of short chain fatty acids via reverse phase chromatography mass spectrometry
Source: PubMed Central journal article supplement (PMC9020710; doi:10.1371/journal.pone.0267093), 2022-04-20
Supplement: pone.0267093.s006.pdf [file pone.0267093.s006.pdf]

**S2 Table. Caecal samples and extraction details.**

| Location | Flora | wet weight (mg) | Extraction solvent ( $\mu\text{L}$ ) |
|----------|-------|-----------------|--------------------------------------|
| Caecum   | SPF   | 88.7            | 177.4 <sup>a</sup>                   |
| Caecum   | SPF   | 59.9            | 119.8 <sup>a</sup>                   |
| Caecum   | SPF   | 86.1            | 172.2 <sup>a</sup>                   |
| Caecum   | SPF   | 84.3            | 168.6 <sup>a</sup>                   |
| Caecum   | GF    | 137.4           | 274.8 <sup>b</sup>                   |
| Caecum   | GF    | 210.0           | 420.0 <sup>b</sup>                   |
| Caecum   | GF    | 172.7           | 345.4 <sup>b</sup>                   |
| Caecum   | GF    | 106.4           | 212.8 <sup>b</sup>                   |
| Caecum   | GF    | 141.5           | 283.0 <sup>b</sup>                   |

<sup>a</sup> IS spiked-in concentrations: 10 mM  $^{13}\text{C}$ -Acetate / 1 mM  $^{13}\text{C}$ -Propionate / 2.5 mM  $^{13}\text{C}$ -Butyrate.

<sup>b</sup> IS spiked-in concentrations: 100  $\mu\text{M}$   $^{13}\text{C}$ -Acetate / 50  $\mu\text{M}$   $^{13}\text{C}$ -Propionate / 50  $\mu\text{M}$   $^{13}\text{C}$ -Butyrate.
