# Supplementary material for: Method for absolute quantification of short chain fatty acids via reverse phase chromatography mass spectrometry
Source: PubMed Central journal article supplement (PMC9020710; doi:10.1371/journal.pone.0267093), 2022-04-20
Supplement: pone.0267093.s007.pdf [file pone.0267093.s007.pdf]

**S3 Table. Regression line equations and  $r^2$  corresponding to plots in Figure 2.**

| SCFA       | Regression line equation | $r^2$ |
|------------|--------------------------|-------|
| Acetate    | $y = 0.9119x + 0.2089$   | 0.996 |
| Propionate | $y = 1.0628x + 0.3525$   | 0.998 |
| Butyrate   | $y = 1.0078x + 0.5665$   | 0.991 |
